# Supplementary material
Source: PubMed Central journal article supplement (PMC9420768)
Supplement: NIHMS1811487-supplement-Supplemental_Publication_Material.pdf [file NIHMS1811487-supplement-Supplemental_Publication_Material.pdf]

## SUPPLEMENTAL MATERIALS

### **Dietary meat, trimethylamine-N oxide-related metabolites, and incident cardiovascular disease among older adults: the Cardiovascular Health Study**

Meng Wang<sup>1\*</sup>, Zeneng Wang<sup>2,3\*</sup>, Yujin Lee<sup>4</sup>, Heidi TM Lai<sup>5</sup>, Marcia C. de Oliveira Otto<sup>6</sup>, Rozenn N. Lemaitre<sup>7</sup>, Amanda Fretts<sup>7,8</sup>, Nona Sotoodehnia<sup>7</sup>, Matthew Budoff<sup>9</sup>, Joseph A. DiDonato<sup>2,3</sup>, Barbara McKnight<sup>7,10</sup>, W. H. Wilson Tang<sup>2,3,11</sup>, Bruce M. Psaty<sup>7,8,12</sup>, David S. Siscovick<sup>13</sup>, Stanley L. Hazen<sup>2,3,11\*</sup>, Dariush Mozaffarian<sup>1\*</sup>

\*equal contributions

<sup>1</sup>Friedman School of Nutrition Science and Policy, Tufts University, Boston, MA

<sup>2</sup>Department of Cardiovascular and Metabolic Sciences, Lerner Research Institute, Cleveland Clinic, Cleveland, OH

<sup>3</sup>Center for Microbiome and Human Health, Lerner Research Institute, Cleveland Clinic, Cleveland, OH

<sup>4</sup>Department of Food and Nutrition, Myongji University, Yongin, South Korea 17055

<sup>5</sup>Imperial College London, Department of Primary Care and Public Health, London, SW7 2AZ, UK

<sup>6</sup>Division of Epidemiology, Human Genetics and Environmental Sciences, The University of Texas Health Science Center at Houston (UTHealth) School of Public Health, Houston, TX

<sup>7</sup>Cardiovascular Health Research Unit, Department of Medicine, University of Washington, Seattle, WA

<sup>8</sup>Department of Epidemiology, University of Washington, Seattle, WA

<sup>9</sup>Los Angeles BioMedical Research Institute, Harbor UCLA Medical Center, CA

<sup>10</sup>Department of Biostatistics, University of Washington, Seattle, WA

<sup>11</sup>Department of Cardiovascular Medicine, Heart and Vascular Institute, Cleveland Clinic, Cleveland, OH

<sup>12</sup> Department of Health Systems and Population Health, University of Washington, Seattle, WA

<sup>13</sup>The New York Academy of Medicine, New York City, NY

## Methods

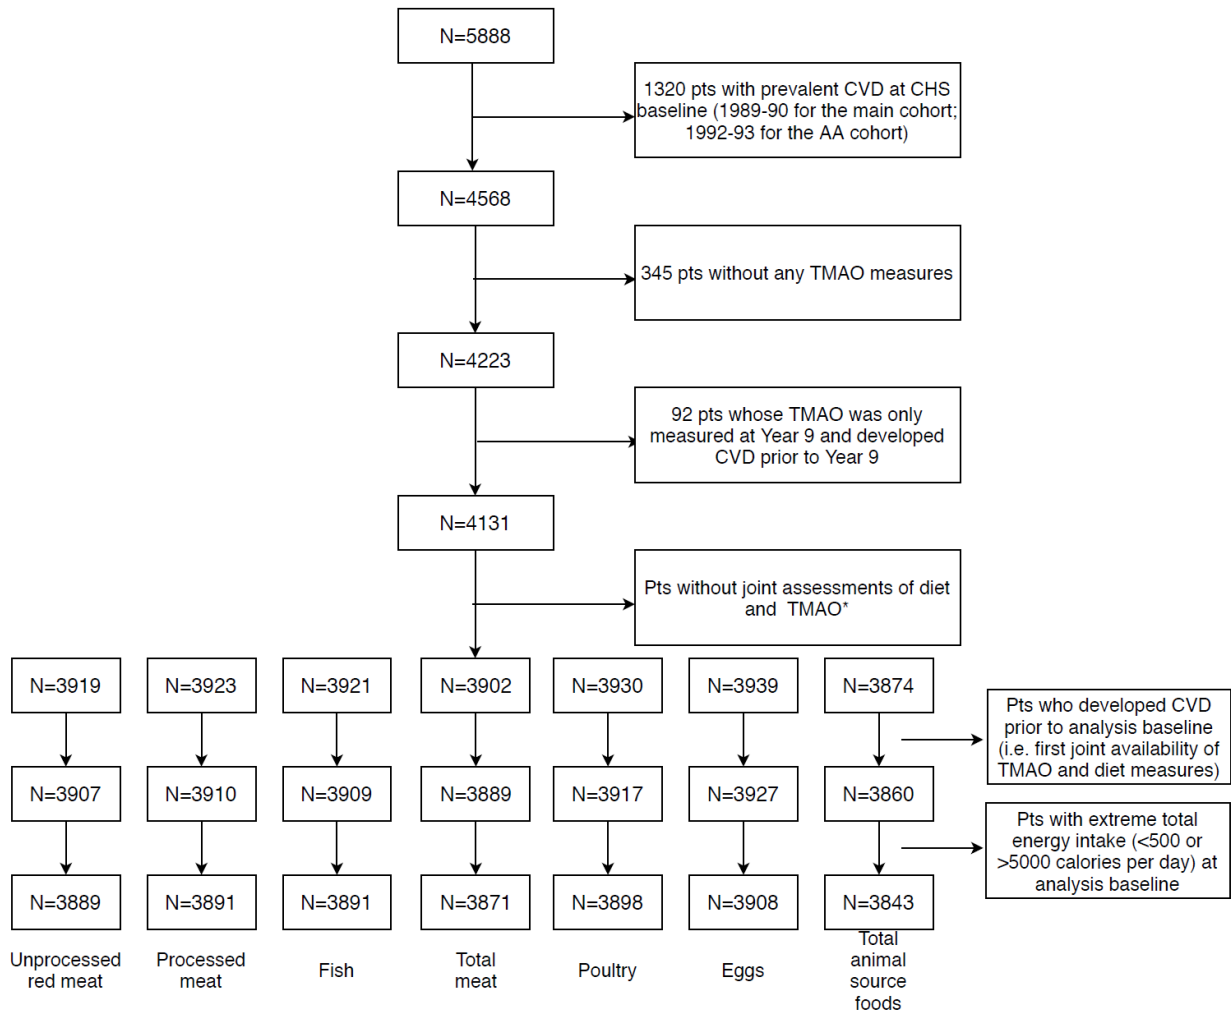

Figure S1. Flowchart of participants included in the analyses of each dietary exposure. Data availability varied by dietary exposures. A total of 3931 participants had available data on at least one exposure. Abbreviation: AA, African-American; CHS, Cardiovascular Health Study; CVD, cardiovascular disease; Pts, participants; TMAO, trimethylamine N-oxide.

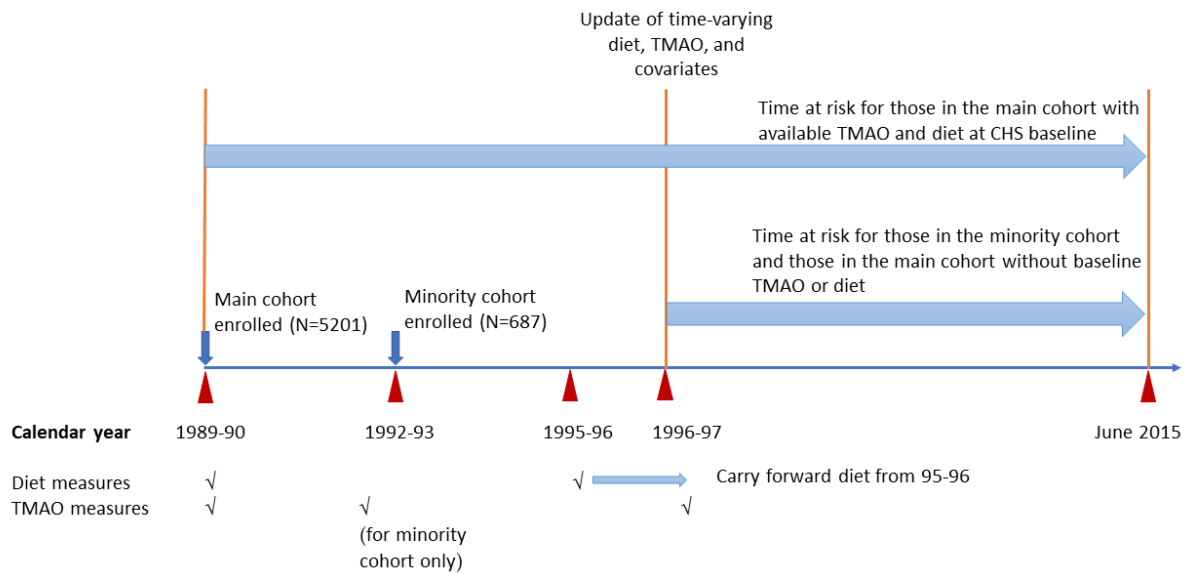

Figure S2. Study design and timing of TMAO and diet assessment. Plasma TMAO-related biomarkers measured at 1989-90 were evaluated as mediators for the association between usual dietary intake at 1989-90 and ASCVD risk until 1996-97, and biomarkers measured at 1996-97 were evaluated as mediators for the association between the average of dietary intakes at 1989-90 and 1996-97 and subsequent risk. Time - varying covariates were updated whenever TMAO-related biomarkers were updated. We used simple updating for non-dietary covariates and cumulative updating for dietary covariates. Abbreviation: CHS, Cardiovascular Health Study; TMAO, trimethylamine N-oxide. Follow-up for ASCVD events started at the baseline TMAO measure and continued through June 2015.

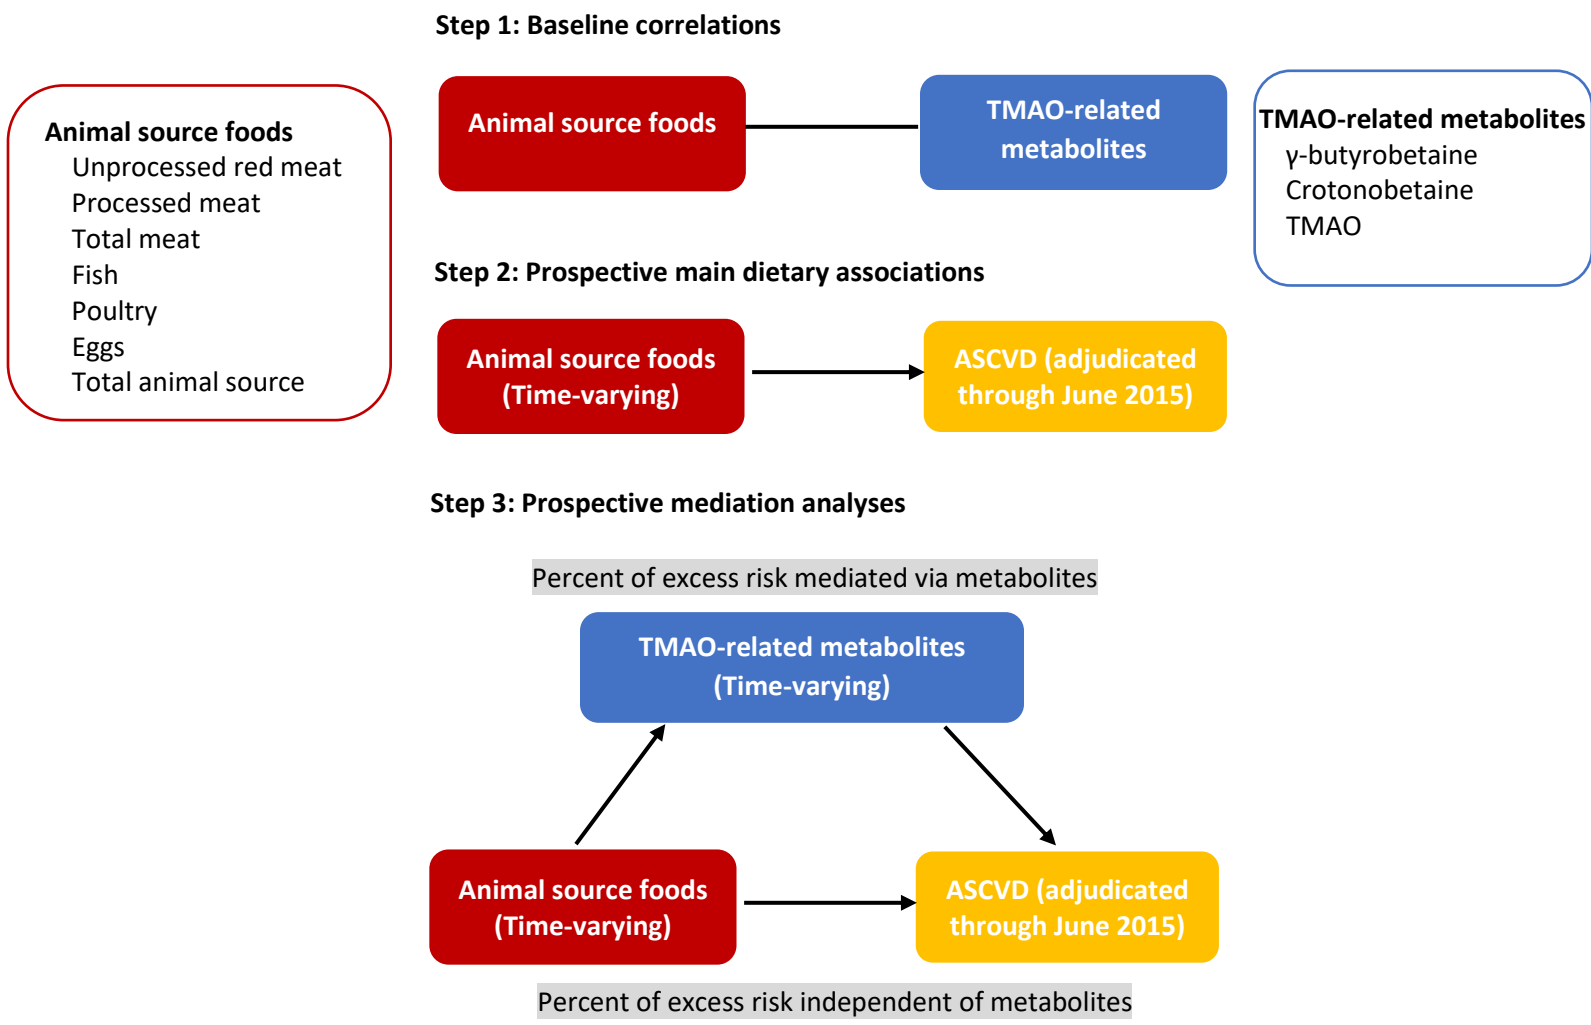

Figure S3. Study flowchart. TMAO: trimethylamine N-oxide; ASCVD: atherosclerotic cardiovascular disease

## Systematic and random measurement errors

Systematic measurement errors may be present when a variable is not measured using the “gold standard” method. However, many of the main covariates used in CHS were measured using a “gold standard” approach for epidemiologic studies. For example, TMAO-related metabolites were measured using a targeted, mass spectrometry-based approach, with low lab CVs.<sup>7</sup> Anthropometrics and blood pressure were directly measured by trained personnel, and the average of 2 blood pressure readings taken after a 5-minute rest was used.<sup>25</sup> Laboratory measures such as lipids, CRP, glucose, creatinine, and cystatin C were all directly measured from fasting blood samples using standardized methods<sup>25, 44</sup>. Creatine, measured using a colorimetric assay, was further calibrated to isotope dilution mass spectrometry measures from the Cleveland Clinic Research Laboratory.<sup>45</sup> Therefore, the magnitude of systematic measurement errors in each of these factors should not be large.

Habitual diet was measured using food frequency questionnaires (FFQ) validated against multiple 24-hour dietary recalls or week diet records.<sup>33-34,36</sup> Nevertheless, self-reported FFQs can have measurement errors compared to the more objective approach of diet records, although diet records have the separate limitation of assessing a very short period of time (e.g., 24 hours or 1 week), rather than true habitual intake. Thus, there is no perfect measure of true long-term dietary intake.

Given the above points and the unavailability of data (i.e., regression coefficients from the model regressing a gold standard measure such as dietary record or recall on FFQ measures and all covariates) needed for performing dietary measurement correction, we did not perform corrections for systematic measurement errors.

Cohort studies that only evaluate a single measure of exposures and covariates at baseline are subject to random measurement errors due to possible within-subject variations in these measures over time. We have in part addressed this type of error by using time-varying exposures, mediators, and covariates with updated values over time.

## Statistical analysis

The causal mediation analysis method of Huang and Yang<sup>55</sup> under the Aalen additive hazard model was used to assess the evidence for mediation. For each dietary exposure, to decompose the association with ASCVD into those independent of and mediated via the three TMAO-related metabolites, we first fit three linear mixed models for  $\gamma$ -butyrobetaine (M1), crotonobetaine (M2), and TMAO (M3), respectively. The model for  $\gamma$ -butyrobetaine included the dietary exposure (A) and all covariates (X); the model for crotonobetaine included the dietary exposure,  $\gamma$ -butyrobetaine, and all covariates; the model for TMAO included the dietary exposure,  $\gamma$ -butyrobetaine, crotonobetaine, and all covariates. These three models are shown below:

$$M_{1it} = \alpha_0 + \alpha_A A_{it} + \alpha_X X_{it} + \epsilon_{M1it}$$

$$M_{2it} = \beta_0 + \beta_A A_{it} + \beta_{M1} M_{1it} + \beta_X X_{it} + \epsilon_{M2it}$$

$$M_{3it} = \gamma_0 + \gamma_A A_{it} + \gamma_{M1} M_{1it} + \gamma_{M2} M_{2it} + \gamma_X X_{it} + \epsilon_{M3it},$$

where the error term  $\epsilon_{M1it}$ ,  $\epsilon_{M2it}$ , and  $\epsilon_{M3it}$  are independent and normally distributed with mean zero and model-specific variances.

At the second step, we fit an Aalen additive hazard model for the outcome (time to ASCVD) that included the dietary exposure,  $\gamma$ -butyrobetaine, crotonobetaine, TMAO, and all covariates:

$$\lambda(t|A_{it}, M_{1it}, M_{2it}, M_{3it}, X_{it}) = \lambda_i(t) = \lambda_0(t) + \lambda_A A_{it} + \lambda_{M1} M_{1it} + \lambda_{M2} M_{2it} + \lambda_{M3} M_{3it} + \lambda_X X_{it},$$

where  $\lambda_i(t)$  is the hazard of developing ASCVD for participant  $i$  at time  $t$ ;  $\lambda_0(t)$  is the baseline hazard, and  $\lambda_A$ ,  $\lambda_{M1}$ ,  $\lambda_{M2}$ ,  $\lambda_{M3}$ , and  $\lambda_X$  are regression coefficients for the dietary exposure,  $\gamma$ -butyrobetaine, crotonobetaine, TMAO, and covariates X, respectively. The assumptions of constant hazard difference were examined, and no variables violated this assumption.

As in Huang and Yang<sup>55</sup>, the natural direct effect measuring the association between a dietary exposure and ASCVD that is not mediated by any of the three mediators,

$$\lambda(t|A_{1t}, M_{1it}(A_{2t}), M_{2it}(A_{3t}, M_{1it}(A_{2t})), M_{3it}(A_{4t}, M_{1it}(A_{2t}), M_{2it}(A_{3t}, M_{1it}(A_{2t}))), X_{it}) - \lambda(t|A_{0t}, M_{1it}(A_{2t}), M_{2it}(A_{3t}, M_{1it}(A_{2t})), M_{3it}(A_{4t}, M_{1it}(A_{2t}), M_{2it}(A_{3t}, M_{1it}(A_{2t}))), X_{it}),$$

was assumed not to depend on the value of  $A_{2t}$ ,  $A_{3t}$ , or  $A_{4t}$ . It was estimated by  $\lambda_A(A_1 - A_0)$ , where  $A_1 - A_0$  is the dietary exposure inter-quintile range.

Similarly, the natural indirect effects measuring the associations between a dietary exposure and ASCVD mediated via the three mediators (i.e., mediated association) were also assumed not to depend on the exposure levels leading to adjustment values of the mediators absent from the pathway. We estimated these natural indirect effects by the following 7 path-specific associations:

- (1) A-> $\gamma$ -butyrobetaine->ASCVD, estimated by  $\alpha_A \lambda_{M1}$ ;
- (2) A-> $\gamma$ -butyrobetaine-> crotonobetaine->ASCVD, estimated by  $\alpha_A \beta_{M1} \lambda_{M2}$ ;
- (3) A-> $\gamma$ -butyrobetaine-> crotonobetaine->TMAO->ASCVD, estimated by  $\alpha_A \beta_{M1} \gamma_{M2} \lambda_{M3}$ ;
- (4) A-> $\gamma$ -butyrobetaine->TMAO->ASCVD, estimated by  $\alpha_A \gamma_{M1} \lambda_{M3}$ ;
- (5) A->crotonobetaine->ASCVD, estimated by  $\beta_A \lambda_{M2}$ ;
- (6) A->crotonobetaine->TMAO->ASCVD, estimated by  $\beta_A \gamma_{M2} \lambda_{M3}$ ;
- (7) A->TMAO->ASCVD, estimated by  $\gamma_A \lambda_{M3}$ ,

and the overall natural indirect effect measuring the association between a dietary exposure and ASCVD mediated by one or more of the three mediators was estimated by the sum of these 7 path-specific associations.

Confidence intervals of the path-specific associations and overall mediated association were computed using a resampling method taking 10,000 random draws from multivariate normal distribution of estimates for  $(\alpha_A, \beta_A, \gamma_A, \beta_{M1}, \gamma_{M1}, \gamma_{M2}, \lambda_A, \lambda_{M1}, \lambda_{M2}, \lambda_{M3})$ . Assumptions of independence, positivity, consistency, and normality of mediators similar to those made by Huang and Yang<sup>55</sup> and by Lange and Hansen<sup>56</sup> need to be made with extensions to the scenario of three mediators.

## Results

**Table S1. Comparison of baseline characteristics between participants excluded and included in the study**

|                                      | Excluded        | Included         |
|--------------------------------------|-----------------|------------------|
| N                                    | 637             | 3931             |
| Age, years                           | 75.2 ± 6.5      | 72.1 ± 5.2       |
| Male                                 | 344 (54.0)      | 1436 (36.5)      |
| Race                                 |                 |                  |
| White                                | 386 (60.6)      | 3454 (87.9)      |
| Non-white                            | 251 (39.4)      | 477 (12.1)       |
| Income                               |                 |                  |
| <\$11,999                            | 249 (39.1)      | 878 (22.3)       |
| \$12,000 to 24,999                   | 213 (33.4)      | 1438 (36.6)      |
| \$25,000 to \$49,999                 | 127 (19.9)      | 1079 (27.4)      |
| >\$50,000                            | 48 (7.5)        | 536 (13.6)       |
| Education                            |                 |                  |
| <High school                         | 257 (40.3)      | 1026 (26.1)      |
| High school                          | 138 (21.7)      | 1142 (29.1)      |
| Some college                         | 123 (19.3)      | 926 (23.6)       |
| College graduate                     | 119 (18.7)      | 837 (21.3)       |
| Smoke                                |                 |                  |
| Never Smoked                         | 293 (46.0)      | 1884 (47.9)      |
| Former Smoker                        | 255 (40.0)      | 1572 (40.0)      |
| Current Smoker                       | 89 (14.0)       | 475 (12.1)       |
| Alcohol, drinks/week                 | 0.0 (0.0 - 1.0) | 0.0 (0.0 - 1.3)  |
| Physical activity, kcal/week         | 518 (0 - 1370)  | 634 (158 - 1590) |
| General Health                       |                 |                  |
| Excellent                            | 72 (11.3)       | 648 (16.5)       |
| Very good                            | 129 (20.3)      | 1101 (28.0)      |
| Good                                 | 231 (36.3)      | 1463 (37.2)      |
| Fair                                 | 171 (26.8)      | 638 (16.2)       |
| Poor                                 | 34 (5.3)        | 81 (2.1)         |
| Body mass index (kg/m <sup>2</sup> ) | 26.9 ± 5.1      | 26.6 ± 4.7       |
| Medical history                      |                 |                  |
| Anti-hypertensive drugs              | 288 (45.2)      | 1534 (39.0)      |
| Lipid-lowering drugs                 | 26 (4.1)        | 175 (4.5)        |
| Oral hypoglycemic agents or insulin  | 82 (12.9)       | 234 (6.0)        |
| Antibiotics                          | 18 (2.8)        | 108 (2.7)        |
| Prevalence of diabetes               | 179 (28.1)      | 760 (19.3)       |

Comparison was performed among 4568 subjects without prevent cardiovascular disease at baseline. A participant was considered as “included” if he/she was included in at least one analysis.



**Table S2. Population characteristics of older U.S. men and women in the Cardiovascular Health Study, by quintiles of processed meat intake**

|                                      | Q1               | Q2               | Q3               | Q4               | Q5              | Total            |
|--------------------------------------|------------------|------------------|------------------|------------------|-----------------|------------------|
| N                                    | 779              | 778              | 778              | 778              | 778             | 3891             |
| Range, servings/day                  | (0.01 – 0.09)    | (0.09 – 0.18)    | (0.18 – 0.34)    | (0.34 – 0.60)    | (0.60 – 2.82)   | (0.01 – 2.82)    |
| <b>Sociodemographic</b>              |                  |                  |                  |                  |                 |                  |
| Age, years                           | 72.7 ± 5.4       | 72.4 ± 5.2       | 72.8 ± 5.8       | 73.2 ± 6.1       | 73.1 ± 5.7      | 72.9 ± 5.6       |
| Male                                 | 202 (25.9)       | 211 (27.1)       | 266 (34.2)       | 356 (45.8)       | 385 (49.5)      | 1420 (36.5)      |
| Race                                 |                  |                  |                  |                  |                 |                  |
| White                                | 706 (90.6)       | 705 (90.6)       | 696 (89.5)       | 678 (87.1)       | 632 (81.2)      | 3417 (87.8)      |
| Non-white                            | 73 (9.4)         | 73 (9.4)         | 82 (10.5)        | 100 (12.9)       | 146 (18.8)      | 474 (12.2)       |
| Income                               |                  |                  |                  |                  |                 |                  |
| <\$11,999                            | 143 (18.4)       | 154 (19.8)       | 152 (19.5)       | 189 (24.3)       | 229 (29.4)      | 867 (22.3)       |
| \$12,000 to 24,999                   | 271 (34.8)       | 274 (35.2)       | 287 (36.9)       | 292 (37.5)       | 297 (38.2)      | 1421 (36.5)      |
| \$25,000 to \$49,999                 | 218 (28.0)       | 233 (29.9)       | 233 (29.9)       | 197 (25.3)       | 188 (24.2)      | 1069 (27.5)      |
| >\$50,000                            | 147 (18.9)       | 117 (15.0)       | 106 (13.6)       | 100 (12.9)       | 64 (8.2)        | 534 (13.7)       |
| Education                            |                  |                  |                  |                  |                 |                  |
| <High school                         | 125 (16.0)       | 168 (21.6)       | 187 (24.0)       | 246 (31.6)       | 281 (36.1)      | 1007 (25.9)      |
| High school                          | 231 (29.7)       | 220 (28.3)       | 228 (29.3)       | 222 (28.5)       | 235 (30.2)      | 1136 (29.2)      |
| Some college                         | 192 (24.6)       | 205 (26.3)       | 193 (24.8)       | 178 (22.9)       | 147 (18.9)      | 915 (23.5)       |
| College graduate                     | 231 (29.7)       | 185 (23.8)       | 170 (21.9)       | 132 (17.0)       | 115 (14.8)      | 833 (21.4)       |
| <b>Lifestyle</b>                     |                  |                  |                  |                  |                 |                  |
| Smoking                              |                  |                  |                  |                  |                 |                  |
| Never Smoked                         | 410 (52.6)       | 389 (50.0)       | 377 (48.5)       | 355 (45.6)       | 318 (40.9)      | 1849 (47.5)      |
| Former Smoker                        | 305 (39.2)       | 305 (39.2)       | 316 (40.6)       | 334 (42.9)       | 318 (40.9)      | 1578 (40.6)      |
| Current Smoker                       | 64 (8.2)         | 84 (10.8)        | 85 (10.9)        | 89 (11.4)        | 142 (18.3)      | 464 (11.9)       |
| Alcohol, drinks/week                 | 0.0 (0.0 - 1.3)  | 0.0 (0.0 - 1.3)  | 0.0 (0.0 - 2.0)  | 0.0 (0.0 - 2.0)  | 0.0 (0.0 - 1.0) | 0.0 (0.0 - 1.3)  |
| Physical activity, kcal/week         | 680 (158 - 1645) | 602 (131 - 1443) | 653 (198 - 1480) | 601 (131 - 1610) | 540 (90 - 1473) | 620 (135 - 1530) |
| General Health                       |                  |                  |                  |                  |                 |                  |
| Excellent                            | 156 (20.0)       | 106 (13.6)       | 120 (15.4)       | 109 (14.0)       | 84 (10.8)       | 575 (14.8)       |
| Very good                            | 217 (27.9)       | 244 (31.4)       | 216 (27.8)       | 208 (26.7)       | 196 (25.2)      | 1081 (27.8)      |
| Good                                 | 288 (37.0)       | 295 (37.9)       | 325 (41.8)       | 281 (36.1)       | 321 (41.3)      | 1510 (38.8)      |
| Fair                                 | 103 (13.2)       | 125 (16.1)       | 108 (13.9)       | 160 (20.6)       | 154 (19.8)      | 650 (16.7)       |
| Poor                                 | 15 (1.9)         | 8 (1.0)          | 9 (1.2)          | 20 (2.6)         | 23 (3.0)        | 75 (1.9)         |
| Body mass index (kg/m <sup>2</sup> ) | 25.9 ± 4.6       | 26.3 ± 4.7       | 26.6 ± 4.5       | 27.2 ± 4.7       | 27.1 ± 4.8      | 26.6 ± 4.7       |

**Medical history**

|                                         |            |            |            |            |            |             |
|-----------------------------------------|------------|------------|------------|------------|------------|-------------|
| Anti-hypertensive drugs                 | 292 (37.5) | 301 (38.7) | 341 (43.8) | 321 (41.3) | 325 (41.8) | 1580 (40.6) |
| Lipid-lowering drugs                    | 55 (7.1)   | 38 (4.9)   | 46 (5.9)   | 22 (2.8)   | 27 (3.5)   | 188 (4.8)   |
| Oral antihyperglycemic drugs or insulin | 32 (4.1)   | 40 (5.1)   | 43 (5.5)   | 54 (6.9)   | 81 (10.4)  | 250 (6.4)   |
| Antibiotics                             | 23 (3.0)   | 20 (2.6)   | 17 (2.2)   | 22 (2.8)   | 33 (4.2)   | 115 (3.0)   |
| Prevalent of diabetes                   | 113 (14.5) | 146 (18.8) | 161 (20.7) | 164 (21.1) | 204 (26.2) | 788 (20.3)  |

**Diet**

|                                         |                |                |                |                |                |                |
|-----------------------------------------|----------------|----------------|----------------|----------------|----------------|----------------|
| Fruits, servings/day                    | 2.7 ± 1.1      | 2.3 ± 1.0      | 2.2 ± 1.0      | 2.0 ± 0.9      | 1.8 ± 0.9      | 2.2 ± 1.1      |
| Vegetables, servings/day                | 3.2 ± 1.4      | 2.8 ± 1.2      | 2.6 ± 1.2      | 2.4 ± 1.1      | 2.2 ± 1.2      | 2.6 ± 1.3      |
| Dietary fiber, g/day                    | 34.7 ± 10.7    | 32.3 ± 9.9     | 29.8 ± 9.2     | 27.6 ± 8.8     | 25.1 ± 8.3     | 29.9 ± 10.0    |
| Dairy products, servings/day            | 1.4 ± 0.7      | 1.3 ± 0.6      | 1.3 ± 0.6      | 1.2 ± 0.6      | 1.1 ± 0.6      | 1.3 ± 0.6      |
| Total animal source foods, servings/day | 1.3 ± 0.6      | 1.4 ± 0.5      | 1.6 ± 0.5      | 1.8 ± 0.5      | 2.3 ± 0.7      | 1.7 ± 0.7      |
| Unprocessed meat, servings/day          | 0.3 ± 0.3      | 0.4 ± 0.3      | 0.5 ± 0.3      | 0.5 ± 0.3      | 0.5 ± 0.3      | 0.5 ± 0.3      |
| Fish, servings/day                      | 0.4 ± 0.3      | 0.3 ± 0.2      | 0.3 ± 0.2      | 0.3 ± 0.2      | 0.2 ± 0.2      | 0.3 ± 0.2      |
| Poultry, servings/day                   | 0.4 ± 0.3      | 0.4 ± 0.3      | 0.3 ± 0.3      | 0.3 ± 0.2      | 0.3 ± 0.3      | 0.3 ± 0.3      |
| Eggs, servings/day                      | 0.2 ± 0.2      | 0.2 ± 0.2      | 0.2 ± 0.2      | 0.2 ± 0.2      | 0.3 ± 0.3      | 0.2 ± 0.2      |
| Total energy intake, calories/day       | 1792.5 ± 557.2 | 1741.4 ± 560.0 | 1767.0 ± 669.7 | 1957.1 ± 724.6 | 1837.1 ± 654.0 | 1819.0 ± 640.6 |

**TMAO-related biomarkers**

|                      |                       |                       |                       |                       |                       |                       |
|----------------------|-----------------------|-----------------------|-----------------------|-----------------------|-----------------------|-----------------------|
| TMAO, μM             | 4.7 (3.1 - 8.2)       | 4.7 (3.2 - 7.8)       | 4.7 (3.1 - 7.4)       | 4.6 (3.2 - 7.7)       | 4.8 (3.4 - 7.6)       | 4.7 (3.2 - 7.7)       |
| Choline, μM          | 9.3 (7.9 - 10.7)      | 9.3 (8.0 - 11.2)      | 9.4 (8.0 - 11.1)      | 9.8 (8.4 - 11.4)      | 9.8 (8.4 - 11.7)      | 9.5 (8.1 - 11.2)      |
| Betaine, μM          | 36.5 ± 12.9           | 36.6 ± 13.7           | 36.8 ± 13.4           | 37.6 ± 12.3           | 37.6 ± 12.6           | 37.0 ± 13.0           |
| Carnitine, μM        | 35.7 ± 7.8            | 37.0 ± 8.6            | 37.5 ± 7.8            | 37.5 ± 8.3            | 37.9 ± 8.4            | 37.1 ± 8.2            |
| γ -Butyrobetaine, μM | 1.0 ± 0.3             | 1.0 ± 0.3             | 1.0 ± 0.3             | 1.1 ± 0.3             | 1.1 ± 0.4             | 1.0 ± 0.3             |
| Crotonobetaine, μM   | 0.021 (0.010 - 0.027) | 0.022 (0.010 - 0.028) | 0.022 (0.010 - 0.029) | 0.023 (0.010 - 0.029) | 0.025 (0.020 - 0.031) | 0.023 (0.010 - 0.029) |

Values are N (%), mean ± SD, or median (IQR) at analysis baseline (1989-1990 for 3334 subjects and 1996-97 for 557 subjects).

Food intakes were energy-adjusted.

TMAO: trimethylamine N-oxide

**Table S3. Population characteristics of older U.S. men and women in the Cardiovascular Health Study, by quintiles of fish intake**

|                                      | Q1              | Q2               | Q3               | Q4               | Q5               | Total            |
|--------------------------------------|-----------------|------------------|------------------|------------------|------------------|------------------|
| N                                    | 779             | 778              | 778              | 778              | 778              | 3891             |
| (range, servings/day)                | (0.01 – 0.12)   | (0.12 – 0.21)    | (0.21 – 0.31)    | (0.31 – 0.44)    | (0.44 – 2.09)    | (0.01 – 2.09)    |
| <b>Sociodemographic</b>              |                 |                  |                  |                  |                  |                  |
| Age, years                           | 73.9 ± 6.2      | 73.2 ± 5.7       | 73.1 ± 5.6       | 72.2 ± 5.4       | 71.9 ± 5.0       | 72.9 ± 5.6       |
| Male                                 | 343 (44.0)      | 300 (38.6)       | 315 (40.5)       | 259 (33.3)       | 201 (25.8)       | 1418 (36.4)      |
| Race                                 |                 |                  |                  |                  |                  |                  |
| White                                | 695 (89.2)      | 681 (87.5)       | 672 (86.4)       | 702 (90.2)       | 668 (85.9)       | 3418 (87.8)      |
| Non-white                            | 84 (10.8)       | 97 (12.5)        | 106 (13.6)       | 76 (9.8)         | 110 (14.1)       | 473 (12.2)       |
| Income                               |                 |                  |                  |                  |                  |                  |
| <\$11,999                            | 209 (26.8)      | 168 (21.6)       | 164 (21.1)       | 158 (20.3)       | 168 (21.6)       | 867 (22.3)       |
| \$12,000 to 24,999                   | 326 (41.8)      | 305 (39.2)       | 275 (35.3)       | 277 (35.6)       | 241 (31.0)       | 1424 (36.6)      |
| \$25,000 to \$49,999                 | 174 (22.3)      | 219 (28.1)       | 232 (29.8)       | 225 (28.9)       | 216 (27.8)       | 1066 (27.4)      |
| >\$50,000                            | 70 (9.0)        | 86 (11.1)        | 107 (13.8)       | 118 (15.2)       | 153 (19.7)       | 534 (13.7)       |
| Education                            |                 |                  |                  |                  |                  |                  |
| <High school                         | 263 (33.8)      | 197 (25.3)       | 204 (26.2)       | 175 (22.5)       | 169 (21.7)       | 1008 (25.9)      |
| High school                          | 218 (28.0)      | 235 (30.2)       | 230 (29.6)       | 222 (28.5)       | 232 (29.8)       | 1137 (29.2)      |
| Some college                         | 179 (23.0)      | 184 (23.7)       | 180 (23.1)       | 194 (24.9)       | 178 (22.9)       | 915 (23.5)       |
| College graduate                     | 119 (15.3)      | 162 (20.8)       | 164 (21.1)       | 187 (24.0)       | 199 (25.6)       | 831 (21.4)       |
| <b>Lifestyle</b>                     |                 |                  |                  |                  |                  |                  |
| Smoke                                |                 |                  |                  |                  |                  |                  |
| Never Smoked                         | 366 (47.0)      | 387 (49.7)       | 363 (46.7)       | 373 (47.9)       | 362 (46.5)       | 1851 (47.6)      |
| Former Smoker                        | 293 (37.6)      | 300 (38.6)       | 316 (40.6)       | 328 (42.2)       | 340 (43.7)       | 1577 (40.5)      |
| Current Smoker                       | 120 (15.4)      | 91 (11.7)        | 99 (12.7)        | 77 (9.9)         | 76 (9.8)         | 463 (11.9)       |
| Alcohol, drinks/week                 | 0.0 (0.0 - 1.0) | 0.0 (0.0 - 1.5)  | 0.0 (0.0 - 1.5)  | 0.0 (0.0 - 1.3)  | 0.0 (0.0 - 1.3)  | 0.0 (0.0 - 1.3)  |
| Physical activity, kcal/week         | 490 (79 - 1365) | 663 (140 - 1605) | 630 (158 - 1470) | 716 (184 - 1653) | 603 (135 - 1553) | 613 (135 - 1530) |
| General Health                       |                 |                  |                  |                  |                  |                  |
| Excellent                            | 107 (13.7)      | 117 (15.0)       | 108 (13.9)       | 125 (16.1)       | 118 (15.2)       | 575 (14.8)       |
| Very good                            | 204 (26.2)      | 218 (28.0)       | 217 (27.9)       | 222 (28.5)       | 221 (28.4)       | 1082 (27.8)      |
| Good                                 | 286 (36.7)      | 294 (37.8)       | 320 (41.1)       | 303 (38.9)       | 304 (39.1)       | 1507 (38.7)      |
| Fair                                 | 160 (20.5)      | 131 (16.8)       | 121 (15.6)       | 114 (14.7)       | 125 (16.1)       | 651 (16.7)       |
| Poor                                 | 22 (2.8)        | 18 (2.3)         | 12 (1.5)         | 14 (1.8)         | 10 (1.3)         | 76 (2.0)         |
| Body mass index (kg/m <sup>2</sup> ) | 26.1 ± 4.7      | 26.5 ± 4.6       | 26.7 ± 4.6       | 26.8 ± 4.7       | 27.0 ± 4.8       | 26.6 ± 4.7       |

**Medical history**

|                                         |            |            |            |            |            |             |
|-----------------------------------------|------------|------------|------------|------------|------------|-------------|
| Anti-hypertensive drugs                 | 310 (39.8) | 320 (41.1) | 306 (39.3) | 310 (39.8) | 331 (42.5) | 1577 (40.5) |
| Lipid-lowering drugs                    | 22 (2.8)   | 34 (4.4)   | 37 (4.8)   | 39 (5.0)   | 56 (7.2)   | 188 (4.8)   |
| Oral antihyperglycemic drugs or insulin | 63 (8.1)   | 48 (6.2)   | 50 (6.4)   | 46 (5.9)   | 44 (5.7)   | 251 (6.5)   |
| Antibiotics                             | 24 (3.1)   | 19 (2.4)   | 26 (3.3)   | 18 (2.3)   | 23 (3.0)   | 110 (2.8)   |
| Prevalent of diabetes                   | 171 (22.0) | 142 (18.3) | 172 (22.1) | 164 (21.1) | 140 (18.0) | 789 (20.3)  |

**Diet**

|                                         |                |                |                |                |                |                |
|-----------------------------------------|----------------|----------------|----------------|----------------|----------------|----------------|
| Fruits, servings/day                    | 2.0 ± 1.1      | 2.1 ± 1.0      | 2.2 ± 1.1      | 2.3 ± 1.1      | 2.3 ± 1.0      | 2.2 ± 1.1      |
| Vegetables, servings/day                | 2.2 ± 1.3      | 2.4 ± 1.2      | 2.6 ± 1.1      | 2.8 ± 1.2      | 3.0 ± 1.3      | 2.6 ± 1.3      |
| Dietary fiber, g/day                    | 28.3 ± 10.7    | 29.2 ± 10.3    | 29.8 ± 9.1     | 31.2 ± 9.8     | 31.2 ± 9.8     | 29.9 ± 10.0    |
| Dairy products, servings/day            | 1.2 ± 0.6      | 1.3 ± 0.6      | 1.3 ± 0.6      | 1.3 ± 0.6      | 1.3 ± 0.7      | 1.3 ± 0.6      |
| Total animal source foods, servings/day | 1.6 ± 0.7      | 1.6 ± 0.6      | 1.6 ± 0.6      | 1.7 ± 0.6      | 2.0 ± 0.7      | 1.7 ± 0.7      |
| Unprocessed meat, servings/day          | 0.5 ± 0.4      | 0.5 ± 0.3      | 0.5 ± 0.3      | 0.4 ± 0.3      | 0.4 ± 0.4      | 0.5 ± 0.3      |
| Processed meat, servings/day            | 0.5 ± 0.4      | 0.4 ± 0.3      | 0.4 ± 0.3      | 0.3 ± 0.3      | 0.3 ± 0.3      | 0.4 ± 0.3      |
| Poultry, servings/day                   | 0.3 ± 0.2      | 0.3 ± 0.2      | 0.3 ± 0.2      | 0.4 ± 0.3      | 0.4 ± 0.3      | 0.3 ± 0.3      |
| Eggs, servings/day                      | 0.2 ± 0.3      | 0.2 ± 0.3      | 0.2 ± 0.2      | 0.2 ± 0.2      | 0.2 ± 0.2      | 0.2 ± 0.2      |
| Total energy intake, calories/day       | 1789.7 ± 624.9 | 1761.1 ± 611.9 | 1895.0 ± 674.1 | 1884.3 ± 615.4 | 1761.3 ± 658.1 | 1818.2 ± 639.8 |

**TMAO-related biomarkers**

|                      |                       |                       |                       |                       |                       |                       |
|----------------------|-----------------------|-----------------------|-----------------------|-----------------------|-----------------------|-----------------------|
| TMAO, μM             | 4.6 (3.1 - 6.9)       | 4.6 (3.2 - 7.4)       | 4.7 (3.2 - 7.5)       | 5.0 (3.2 - 8.5)       | 4.9 (3.4 - 8.3)       | 4.7 (3.2 - 7.7)       |
| Choline, μM          | 9.7 (8.2 - 11.4)      | 9.6 (8.1 - 11.4)      | 9.5 (8.2 - 11.2)      | 9.6 (8.2 - 11.2)      | 9.2 (8.0 - 10.8)      | 9.5 (8.1 - 11.2)      |
| Betaine, μM          | 37.6 ± 13.5           | 37.5 ± 13.5           | 37.6 ± 12.8           | 36.3 ± 12.8           | 35.8 ± 12.2           | 37.0 ± 13.0           |
| Carnitine, μM        | 37.4 ± 8.2            | 37.1 ± 8.0            | 37.3 ± 8.7            | 36.7 ± 8.3            | 37.0 ± 7.9            | 37.1 ± 8.2            |
| γ -Butyrobetaine, μM | 1.1 ± 0.4             | 1.0 ± 0.3             | 1.0 ± 0.3             | 1.0 ± 0.3             | 1.0 ± 0.3             | 1.0 ± 0.3             |
| Crotonobetaine, μM   | 0.023 (0.010 - 0.030) | 0.023 (0.010 - 0.029) | 0.022 (0.010 - 0.030) | 0.023 (0.010 - 0.028) | 0.022 (0.010 - 0.028) | 0.023 (0.010 - 0.029) |

Values are N (%), mean ± SD, or median (IQR) at analysis baseline (1989-1990 for 3339 subjects and 1996-97 for 552 subjects).

Food intakes were energy-adjusted.

TMAO: trimethylamine N-oxide

**Table S4. Risk of ASCVD associated with intakes of each animal source food (per IQR) and mediation by non-microbiota derived precursors**

|                                                        | Unprocessed red meat | Processed meat    | Total meat *      | Fish            | Poultry            | Eggs              | Total animal source foods <sup>†</sup> |
|--------------------------------------------------------|----------------------|-------------------|-------------------|-----------------|--------------------|-------------------|----------------------------------------|
| <b>Mediator: Choline</b>                               |                      |                   |                   |                 |                    |                   |                                        |
| No. of excess events per 1000 persons per year (95%CI) |                      |                   |                   |                 |                    |                   |                                        |
| Dietary association independent of choline             | 4.0 (-0.1, 8.1)      | 3.6 (-0.4, 7.6)   | 6.3 (1.8, 10.9)   | 0.5 (-3.3, 4.3) | 1.9 (-2.1, 5.8)    | 1.4 (-2.3, 5.0)   | 5.8 (1.3, 10.2)                        |
| Dietary association mediated via choline               | -0.1 (-0.3, 0.0)     | 0.0 (-0.1, 0.1)   | -0.1 (-0.2, 0.1)  | 0.0 (-0.2, 0.1) | -0.1 (-0.3, 0.0)   | 0.1 (0.0, 0.2)    | 0.0 (-0.2, 0.1)                        |
| Mediation proportions (%)                              | -2.3 (-28.5, 0.7)    | 0.2 (-7.8, 9.8)   | -0.9 (-5.9, 1.1)  | NA <sup>‡</sup> | -6.4 (-108.9, 0.6) | 4.4 (-2.5, 83.7)  | -0.9 (-6.3, 1.4)                       |
| <b>Mediator: Betaine</b>                               |                      |                   |                   |                 |                    |                   |                                        |
| No. of excess events per 1000 persons per year (95%CI) |                      |                   |                   |                 |                    |                   |                                        |
| Dietary association independent of betaine             | 4.1 (0.0, 8.1)       | 3.6 (-0.4, 7.7)   | 6.5 (1.9, 11.0)   | 0.5 (-3.3, 4.3) | 1.8 (-2.1, 5.7)    | 1.4 (-2.3, 5.0)   | 5.9 (1.4, 10.3)                        |
| Dietary association mediated via betaine               | -0.1 (-0.3, 0.1)     | 0.0 (-0.2, 0.0)   | -0.1 (-0.4, 0.1)  | 0.0 (-0.1, 0.1) | 0.0 (-0.1, 0.1)    | 0.1 (-0.1, 0.2)   | 0.0 (-0.2, 0.0)                        |
| Mediation proportions (%)                              | -2.5 (-31.5, 2.6)    | -1.3 (-17.1, 1.9) | -2.0 (-11.2, 1.4) | NA <sup>‡</sup> | -1.1 (-26.6, 7.0)  | 4.0 (-7.1, 84.5)  | -0.8 (-5.8, 1.0)                       |
| <b>Mediator: Carnitine</b>                             |                      |                   |                   |                 |                    |                   |                                        |
| No. of excess events per 1000 persons per year (95%CI) |                      |                   |                   |                 |                    |                   |                                        |
| Dietary association independent of carnitine           | 3.9 (-0.2, 8.1)      | 3.6 (-0.5, 7.6)   | 6.3 (1.7, 10.9)   | 0.5 (-3.3, 4.3) | 1.8 (-2.2, 5.7)    | 1.4 (-2.2, 5.1)   | 5.8 (1.3, 10.2)                        |
| Dietary association mediated via carnitine             | 0.0 (-0.3, 0.3)      | 0.0 (-0.1, 0.1)   | 0.0 (-0.3, 0.4)   | 0.0 (-0.1, 0.1) | 0.0 (-0.1, 0.1)    | 0.0 (-0.1, 0.1)   | 0.0 (-0.2, 0.3)                        |
| Mediation proportions (%)                              | 0.3 (-12.5, 20.4)    | 0.1 (-8.1, 10.9)  | 0.5 (-6.1, 9.3)   | NA <sup>‡</sup> | -0.1 (-10.9, 10.4) | 0.1 (-16.2, 17.4) | 0.6 (-4.1, 8.0)                        |

Additive hazard models were adjusted for age (years), sex, race (white vs. non-white), study site (4 categories), education (<high school, high school, some college, or college graduate), income (<\$11,999, \$12,000 to 24,999, \$25,000 to \$49,999, or >\$50,000), and time-varying self-reported health status (excellent, very good, good, fair, or poor), smoking status (never smoked, former smoker, or current smoker), alcohol intake (drinks/week), physical activity (kcal/week, log transformed), antibiotic use (yes vs. no), and intakes of total energy (kcal/day, log-transformed), fruits (servings/day), vegetables (servings/day), dietary fiber (g/day), total dairy products (servings/day), and the other animal source foods mutually adjusted (servings/day). Imputed values were used when animal source foods were adjusted covariates.

Choline was log transformed.

\*Total meat: unprocessed red meat plus processed meat.

<sup>†</sup>Total animal source foods: sum of unprocessed red meat, processed meat, fish, poultry, and eggs.

<sup>‡</sup>Given that the dietary association for fish was close to null, mediation proportions for fish would not be meaningful and were not calculated.

IQR: interquintile range, comparing the midpoints of the first and fifth quintiles.

**Table S5. Risk of ASCVD associated with intakes of each animal source food (per IQR), and joint mediation by TMAO,  $\gamma$ -butyrobetaine, and crotonobetaine: sensitivity analyses using the most recent intake (simple update)**

|                                                                     | Unprocessed red meat | Processed meat    | Total meat *      | Fish              | Poultry           | Eggs              | Total animal source foods <sup>†</sup> |
|---------------------------------------------------------------------|----------------------|-------------------|-------------------|-------------------|-------------------|-------------------|----------------------------------------|
| <b>Main dietary association<sup>‡</sup></b>                         |                      |                   |                   |                   |                   |                   |                                        |
| Hazard ratios (95%CI) <sup>§</sup>                                  | 1.14 (1.01, 1.27)    | 1.07 (0.96, 1.18) | 1.17 (1.04, 1.32) | 1.00 (0.90, 1.12) | 1.05 (0.94, 1.18) | 1.04 (0.97, 1.12) | 1.13 (1.01, 1.27)                      |
| No. of excess events per 1000 persons per year (95%CI) <sup>¶</sup> | 3.9 (0.1, 7.7)       | 2.6 (-1.0, 6.1)   | 5.5 (1.3, 9.6)    | 0.6 (-2.8, 4.0)   | 2.3 (-1.5, 6.2)   | 1.5 (-1.6, 4.7)   | 5.0 (1.0, 9.1)                         |
| <b>Mediation analyses<sup>#</sup></b>                               |                      |                   |                   |                   |                   |                   |                                        |
| No. of excess events per 1000 persons per year (95%CI)              |                      |                   |                   |                   |                   |                   |                                        |
| Dietary association independent of metabolites                      | 3.5 (-0.3, 7.3)      | 2.4 (-1.2, 6.0)   | 5.0 (0.8, 9.2)    | 0.2 (-3.3, 3.6)   | 2.4 (-1.5, 6.2)   | 1.5 (-1.7, 4.6)   | 4.5 (0.5, 8.6)                         |
| Dietary association mediated via metabolites                        | 0.4 (0.1, 0.8)       | 0.1 (-0.1, 0.3)   | 0.4 (0.1, 0.8)    | 0.4 (0.1, 0.8)    | -0.1 (-0.3, 0.1)  | 0.0 (-0.1, 0.2)   | 0.4 (0.1, 0.8)                         |
| Mediation proportions (%)                                           | 10.8 (1.7, 97.2)     | 3.5 (-7.6, 65.5)  | 7.8 (1.1, 37.5)   | NA**              | -3.2 (-70.2, 7.1) | 3.2 (-22.8, 73.5) | 8.8 (2.2, 49.4)                        |

Models were adjusted for age (years), sex, race (white vs. non-white), study site (4 categories), education (<high school, high school, some college, or college graduate), income (<\$11,999, \$12,000 to 24,999, \$25,000 to \$49,999, or >\$50,000), and time-varying self-reported health status (excellent, very good, good, fair, or poor), smoking status (never smoked, former smoker, or current smoker), alcohol intake (drinks/week), physical activity (kcal/week, log transformed for additive hazard model), antibiotic use (yes vs. no), and intakes of total energy (kcal/day, log-transformed for additive hazard models), fruits (servings/day), vegetables (servings/day), dietary fiber (g/day), total dairy products (servings/day), and the other animal source foods mutually adjusted (servings/day). Imputed values were used when animal source foods were adjusted covariates.

\*Total meat: unprocessed red meat plus processed meat.

<sup>†</sup>Total animal source foods: sum of unprocessed red meat, processed meat, fish, poultry, and eggs

<sup>‡</sup>Dietary associations were estimated from models without the three metabolites.

<sup>§</sup>Hazard ratios were estimated from Cox models

<sup>¶</sup>No. of excess events were estimated from additive hazard models.

<sup>#</sup>Mediation analyses were performed using additive hazard models. TMAO and crotonobetaine were log transformed.

\*\*Given that the dietary association for fish was close to null, mediation proportions for fish would not be meaningful and were not calculated.

TMAO: trimethylamine N-oxide. IQR: interquintile range, comparing the midpoints of the first and fifth quintiles.

**Table S6. Risk of ASCVD associated with intakes of each animal source food (per IQR), and joint mediation by TMAO,  $\gamma$ -butyrobetaine, and crotonobetaine: sensitivity analyses with additional adjustments**

|                                                                                 | Unprocessed red meat | Processed meat    | Total meat *      | Fish              | Poultry            | Eggs               | Total animal source foods <sup>†</sup> |
|---------------------------------------------------------------------------------|----------------------|-------------------|-------------------|-------------------|--------------------|--------------------|----------------------------------------|
| <b>Adjust for traditional CVD risk factors<sup>‡</sup></b>                      |                      |                   |                   |                   |                    |                    |                                        |
| <b>Main dietary association<sup>§</sup></b>                                     |                      |                   |                   |                   |                    |                    |                                        |
| Hazard ratios (95% CI) <sup>¶</sup>                                             | 1.15 (1.01, 1.30)    | 1.09 (0.97, 1.23) | 1.21 (1.06, 1.38) | 1.01 (0.89, 1.14) | 1.03 (0.91, 1.17)  | 1.05 (0.95, 1.15)  | 1.17 (1.03, 1.34)                      |
| No. of excess events per 1000 persons per year (95% CI) <sup>#</sup>            | 4.0 (-0.1, 8.1)      | 2.8 (-1.2, 6.8)   | 5.8 (1.2, 10.3)   | 0.7 (-3.1, 4.5)   | 1.6 (-2.3, 5.5)    | 1.7 (-1.9, 5.4)    | 5.6 (1.1, 10.1)                        |
| <b>Mediation analyses<sup>**</sup></b>                                          |                      |                   |                   |                   |                    |                    |                                        |
| No. of excess events per 1000 persons per year (95% CI)                         |                      |                   |                   |                   |                    |                    |                                        |
| Dietary association independent of metabolites                                  | 3.5 (-0.6, 7.6)      | 2.7 (-1.3, 6.7)   | 5.2 (0.7, 9.8)    | 0.4 (-3.4, 4.2)   | 1.7 (-2.2, 5.6)    | 1.8 (-1.9, 5.5)    | 5.2 (0.7, 9.7)                         |
| Dietary association mediated via metabolites                                    | 0.5 (0.1, 0.9)       | 0.2 (-0.1, 0.4)   | 0.5 (0.1, 1.0)    | 0.3 (-0.1, 0.7)   | 0.0 (-0.3, 0.2)    | 0.0 (-0.3, 0.2)    | 0.4 (0.0, 0.9)                         |
| Mediation proportions (%)                                                       | 11.6 (1.9, 127.9)    | 5.6 (-3.8, 96.9)  | 8.9 (1.2, 44.3)   | NA <sup>††</sup>  | -2.0 (-73.3, 25.0) | -2.1 (-75.9, 29.7) | 7.4 (0.6, 39.0)                        |
| <b>Adjust for traditional CVD risk factors<sup>‡</sup> plus continuous eGFR</b> |                      |                   |                   |                   |                    |                    |                                        |
| <b>Main dietary association<sup>§</sup></b>                                     |                      |                   |                   |                   |                    |                    |                                        |
| Hazard ratios (95% CI) <sup>¶</sup>                                             | 1.15 (1.01, 1.30)    | 1.09 (0.97, 1.23) | 1.20 (1.05, 1.38) | 1.00 (0.89, 1.13) | 1.04 (0.92, 1.18)  | 1.06 (0.96, 1.16)  | 1.18 (1.03, 1.35)                      |
| No. of excess events per 1000 persons per year (95% CI) <sup>#</sup>            | 4.0 (-0.1, 8.1)      | 2.9 (-1.1, 6.9)   | 5.8 (1.3, 10.3)   | 0.6 (-3.1, 4.4)   | 2.0 (-1.9, 5.9)    | 2.0 (-1.7, 5.7)    | 6.0 (1.5, 10.5)                        |
| <b>Mediation analyses<sup>**</sup></b>                                          |                      |                   |                   |                   |                    |                    |                                        |
| No. of excess events per 1000 persons per year (95% CI)                         |                      |                   |                   |                   |                    |                    |                                        |
| Dietary association independent of metabolites                                  | 3.8 (-0.4, 7.9)      | 2.8 (-1.2, 6.8)   | 5.6 (1.0, 10.2)   | 0.5 (-3.3, 4.3)   | 2.0 (-2.0, 5.9)    | 2.0 (-1.8, 5.7)    | 5.8 (1.2, 10.3)                        |
| Dietary association mediated via metabolites                                    | 0.2 (-0.2, 0.6)      | 0.1 (-0.2, 0.3)   | 0.2 (-0.3, 0.7)   | 0.2 (-0.2, 0.6)   | 0.0 (-0.1, 0.2)    | 0.0 (-0.2, 0.2)    | 0.2 (-0.3, 0.7)                        |
| Mediation proportions (%)                                                       | 4.9 (-8.5, 61.3)     | 2.3 (-13.0, 47.3) | 3.7 (-5.8, 25.4)  | NA <sup>††</sup>  | 2.0 (-10.6, 43.8)  | 0.8 (-30.8, 49.3)  | 3.8 (-5.3, 24.4)                       |

Both models were adjusted for age (years), sex, race (white vs. non-white), study site (4 categories), education (<high school, high school, some college, or college graduate), income (<\$11,999, \$12,000 to 24,999, \$25,000 to \$49,999, or >\$50,000), and time-varying self-reported health status (excellent, very good, good, fair, or poor), smoking status (never smoked, former smoker, or current smoker), alcohol intake (drinks/week), physical activity (kcal/week, log transformed for additive hazard model), antibiotic use (yes vs. no), and intakes of total energy (kcal/day, log-transformed for additive hazard models), fruits (servings/day), vegetables (servings/day), dietary fiber (g/day), total dairy products (servings/day), and the other animal source foods mutually adjusted (servings/day). Imputed values were used when animal source foods were adjusted covariates.

\*Total meat: unprocessed red meat plus processed meat.

<sup>†</sup>Total animal source foods: sum of unprocessed red meat, processed meat, fish, poultry, and eggs

<sup>‡</sup>Traditional CVD risk factors included BMI (kg/m<sup>2</sup>), waist circumference (cm), SBP (mmHg), DBP (mmHg), HDL cholesterol (mg/dL), LDL cholesterol(mg/dL), triglycerides (mg/dL), diabetes status (Yes/No), CRP (mg/L), anti-hypertensive drugs(Yes/No), and lipid lowering drugs (Yes/No).

<sup>§</sup>Dietary associations were estimated from models without the three metabolites.

<sup>¶</sup>Hazard ratios were estimated from Cox models

<sup>#</sup>No. of excess events were estimated from additive hazard models.

\*\*Mediation analyses were performed using additive hazard models. TMAO and crotonobetaine were log transformed.

††Given that the dietary association for fish was close to null, mediation proportions for fish would not be meaningful and were not calculated.

TMAO: trimethylamine N-oxide. IQR: interquintile range, comparing the midpoints of the first and fifth quintiles.

#### References:

7. Wang Z, Bergeron N, Levison BS, Li XS, Chiu S, Jia X, Koeth RA, Li L, Wu Y, Tang WHW, Krauss RM, Hazen SL. Impact of chronic dietary red meat, white meat, or non-meat protein on trimethylamine n-oxide metabolism and renal excretion in healthy men and women. *European heart journal*. 2019;40:583-594
25. Fried LP, Borhani NO, Enright P, Furberg CD, Gardin JM, Kronmal RA, Kuller LH, Manolio TA, Mittelmark MB, Newman A, et al. The cardiovascular health study: Design and rationale. *Annals of epidemiology*. 1991;1:263-276
44. Steubl D, Buzkova P, Garimella PS, Ix JH, Devarajan P, Bennett MR, Chaves PHM, Shlipak MG, Bansal N, Sarnak MJ. Association of serum uromodulin with eskd and kidney function decline in the elderly: The cardiovascular health study. *Am J Kidney Dis*. 2019;74:501-509
45. Weiner DE, Tighiouart H, Amin MG, Stark PC, MacLeod B, Griffith JL, Salem DN, Levey AS, Sarnak MJ. Chronic kidney disease as a risk factor for cardiovascular disease and all-cause mortality: A pooled analysis of community-based studies. *Journal of the American Society of Nephrology*. 2004;15:1307-1315
33. Kumanyika SK, Tell GS, Shemanski L, Martel J, Chinchilli VM. Dietary assessment using a picture-sort approach. *Am J Clin Nutr*. 1997;65:1123s-1129s
34. Kumanyika S, Tell GS, Shemanski L, Polak J, Savage PJ. Eating patterns of community-dwelling older adults: The cardiovascular health study. *Annals of epidemiology*. 1994;4:404-415
36. Feskanich D, Rimm EB, Giovannucci EL, Colditz GA, Stampfer MJ, Litin LB, Willett WC. Reproducibility and validity of food intake measurements from a semiquantitative food frequency questionnaire. *J Am Diet Assoc*. 1993;93:790-796
55. Huang Y-T, Yang H-I. Causal mediation analysis of survival outcome with multiple mediators. *Epidemiology*. 2017;28:370-378
56. Lange T, Hansen JV. Direct and indirect effects in a survival context. *Epidemiology*. 2011;22:575-581



## Major Resources Table

In order to allow validation and replication of experiments, all essential research materials listed in the Methods should be included in the Major Resources Table below. Authors are encouraged to use public repositories for protocols, data, code, and other materials and provide persistent identifiers and/or links to repositories when available. Authors may add or delete rows as needed.

### Animals (in vivo studies)

| Species | Vendor or Source | Background Strain | Sex | Persistent ID / URL |
|---------|------------------|-------------------|-----|---------------------|
|         |                  |                   |     |                     |
|         |                  |                   |     |                     |
|         |                  |                   |     |                     |

### Genetically Modified Animals

|                 | Species | Vendor or Source | Background Strain | Other Information | Persistent ID / URL |
|-----------------|---------|------------------|-------------------|-------------------|---------------------|
| Parent - Male   |         |                  |                   |                   |                     |
| Parent - Female |         |                  |                   |                   |                     |

### Antibodies

| Target antigen | Vendor or Source | Catalog # | Working concentration | Lot # (preferred but not required) | Persistent ID / URL |
|----------------|------------------|-----------|-----------------------|------------------------------------|---------------------|
|                |                  |           |                       |                                    |                     |
|                |                  |           |                       |                                    |                     |

### DNA/cDNA Clones

| Clone Name | Sequence | Source / Repository | Persistent ID / URL |
|------------|----------|---------------------|---------------------|
|            |          |                     |                     |
|            |          |                     |                     |
|            |          |                     |                     |

### Cultured Cells

| Name | Vendor or Source | Sex (F, M, or unknown) | Persistent ID / URL |
|------|------------------|------------------------|---------------------|
|      |                  |                        |                     |
|      |                  |                        |                     |
|      |                  |                        |                     |

### Data & Code Availability

| Description | Source / Repository             | Persistent ID / URL                                                                                                               |
|-------------|---------------------------------|-----------------------------------------------------------------------------------------------------------------------------------|
| Data        | The Cardiovascular Health Study | <a href="https://chs-nhlbi.org/Internal/CHSData">https://chs-nhlbi.org/Internal/CHSData</a><br>(request should be sent to CHS CC) |
| Code        | Tufts University                | Not publicly available                                                                                                            |
|             |                                 |                                                                                                                                   |

### Other

| Description | Source / Repository | Persistent ID / URL |
|-------------|---------------------|---------------------|
|             |                     |                     |
|             |                     |                     |
|             |                     |                     |
